# Supplementary material for: Predicting Metabolic Pathways of Small Molecules and Enzymes Based on Interaction Information of Chemicals and Proteins
Source: PubMed Central journal article supplement (PMC3448724; doi:10.1371/journal.pone.0045944), 2012-09-21
Supplement: pone.0045944.s001.pdf [file pone.0045944.s001.pdf]

**Online Supporting Information S1.** The benchmark dataset **S** contains 4,002 samples, with 3,348 small molecules and 654 enzymes of yeast. These samples are classified into 11 metabolic pathway classes.

1. 592 samples in “Carbohydrate Metabolism”

(I) 394 small molecules

|        |        |        |        |        |        |        |        |
|--------|--------|--------|--------|--------|--------|--------|--------|
| C00011 | C00022 | C00024 | C00025 | C00026 | C00029 | C00031 | C00033 |
| C00036 | C00042 | C00043 | C00048 | C00052 | C00058 | C00068 | C00072 |
| C00074 | C00083 | C00084 | C00085 | C00089 | C00091 | C00092 | C00095 |
| C00096 | C00099 | C00100 | C00103 | C00109 | C00111 | C00116 | C00117 |
| C00118 | C00119 | C00121 | C00122 | C00124 | C00128 | C00136 | C00137 |
| C00140 | C00149 | C00158 | C00159 | C00160 | C00163 | C00164 | C00167 |
| C00168 | C00181 | C00183 | C00185 | C00186 | C00190 | C00191 | C00197 |
| C00198 | C00199 | C00203 | C00204 | C00207 | C00208 | C00209 | C00221 |
| C00222 | C00227 | C00231 | C00232 | C00236 | C00243 | C00246 | C00247 |
| C00252 | C00256 | C00257 | C00258 | C00259 | C00266 | C00267 | C00270 |
| C00275 | C00279 | C00309 | C00310 | C00311 | C00312 | C00313 | C00325 |
| C00329 | C00332 | C00333 | C00334 | C00345 | C00352 | C00356 | C00357 |
| C00379 | C00392 | C00394 | C00417 | C00424 | C00433 | C00446 | C00469 |
| C00470 | C00474 | C00476 | C00490 | C00492 | C00497 | C00498 | C00501 |
| C00502 | C00507 | C00508 | C00514 | C00531 | C00532 | C00545 | C00546 |
| C00552 | C00558 | C00577 | C00583 | C00617 | C00618 | C00620 | C00631 |
| C00636 | C00644 | C00645 | C00651 | C00663 | C00665 | C00668 | C00672 |
| C00673 | C00679 | C00683 | C00684 | C00689 | C00691 | C00734 | C00741 |
| C00789 | C00794 | C00798 | C00800 | C00804 | C00810 | C00817 | C00818 |
| C00827 | C00861 | C00877 | C00879 | C00880 | C00888 | C00894 | C00898 |
| C00900 | C00905 | C00935 | C00937 | C00973 | C00975 | C00976 | C00988 |
| C00989 | C01011 | C01013 | C01019 | C01040 | C01041 | C01050 | C01068 |
| C01083 | C01089 | C01094 | C01096 | C01097 | C01099 | C01101 | C01109 |
| C01113 | C01114 | C01115 | C01127 | C01131 | C01132 | C01144 | C01146 |
| C01151 | C01159 | C01170 | C01172 | C01177 | C01182 | C01204 | C01213 |
| C01216 | C01218 | C01219 | C01220 | C01222 | C01231 | C01234 | C01235 |
| C01236 | C01243 | C01245 | C01251 | C01272 | C01284 | C01286 | C01380 |
| C01384 | C01412 | C01451 | C01508 | C01613 | C01620 | C01623 | C01674 |
| C01680 | C01697 | C01721 | C01732 | C01769 | C01788 | C01801 | C01825 |
| C01845 | C01904 | C01934 | C01989 | C01990 | C02013 | C02123 | C02170 |
| C02199 | C02225 | C02226 | C02262 | C02266 | C02273 | C02280 | C02330 |
| C02331 | C02335 | C02336 | C02405 | C02411 | C02431 | C02504 | C02527 |
| C02591 | C02612 | C02614 | C02630 | C02670 | C02713 | C02876 | C02888 |
| C02977 | C02985 | C02995 | C03044 | C03046 | C03058 | C03117 | C03217 |
| C03248 | C03267 | C03289 | C03291 | C03383 | C03410 | C03451 | C03459 |
| C03546 | C03548 | C03561 | C03598 | C03599 | C03618 | C03659 | C03660 |
| C03737 | C03752 | C03785 | C03826 | C03906 | C03921 | C03979 | C03981 |
| C04006 | C04037 | C04053 | C04062 | C04063 | C04089 | C04225 | C04257 |

C04287 C04297 C04348 C04349 C04442 C04477 C04501 C04520  
 C04546 C04563 C04573 C04575 C04579 C04593 C04631 C05125  
 C05345 C05378 C05379 C05382 C05385 C05396 C05399 C05400  
 C05401 C05402 C05404 C05411 C05412 C05422 C05668 C05731  
 C05984 C05985 C05986 C05993 C05999 C06002 C06010 C06019  
 C06023 C06027 C06028 C06029 C06030 C06032 C06033 C06118  
 C06142 C06146 C06156 C06186 C06187 C06188 C06192 C06215  
 C06216 C06217 C06218 C06219 C06240 C06241 C06311 C06376  
 C06377 C06441 C06473 C06892 C06893 C11516 C11521 C11544  
 C11555 C13952 C14899 C15923 C15925 C15926 C15930 C16153  
 C16154 C16155 C16156 C16186 C16688 C16698 C17327 C17328  
 C18026 C18324

(II) 198 enzymes

|         |         |         |         |         |
|---------|---------|---------|---------|---------|
| YAL038W | YAL054C | YAL060W | YAL061W | YBL015W |
| YBL068W | YBR001C | YBR006W | YBR018C | YBR019C |
| YBR020W | YBR023C | YBR038W | YBR084W | YBR117C |
| YBR126C | YBR145W | YBR196C | YBR218C | YBR221C |
| YBR299W | YCL009C | YCL040W | YCR005C | YCR012W |
| YCR036W | YDL021W | YDL037C | YDL055C | YDL066W |
| YDL078C | YDL080C | YDL103C | YDL131W | YDL168W |
| YDL174C | YDL182W | YDL246C | YDR001C | YDR009W |
| YDR050C | YDR074W | YDR148C | YDR173C | YDR178W |
| YDR208W | YDR248C | YDR261C | YDR272W | YDR287W |
| YEL011W | YEL058W | YEL070W | YER003C | YER065C |
| YER073W | YER099C | YER178W | YFL017C | YFL018C |
| YFL045C | YFR015C | YFR019W | YFR053C | YGL062W |
| YGL253W | YGL256W | YGR019W | YGR032W | YGR043C |
| YGR087C | YGR192C | YGR194C | YGR204W | YGR240C |
| YGR244C | YGR248W | YGR254W | YGR256W | YGR282C |
| YGR287C | YGR292W | YHL011C | YHL012W | YHR046C |
| YHR104W | YHR163W | YHR174W | YHR183W | YIL043C |
| YIL099W | YIL107C | YIL125W | YIL162W | YIL172C |
| YIR019C | YIR031C | YJL045W | YJL052W | YJL121C |
| YJL153C | YJL155C | YJL200C | YJL216C | YJL221C |
| YJR009C | YJR153W | YJR159W | YKL029C | YKL035W |
| YKL060C | YKL085W | YKL104C | YKL127W | YKL141W |
| YKL148C | YKL150W | YKL152C | YKL181W | YKR043C |
| YKR097W | YLL041C | YLR044C | YLR070C | YLR153C |
| YLR164W | YLR174W | YLR240W | YLR258W | YLR286C |
| YLR300W | YLR304C | YLR305C | YLR307W | YLR308W |
| YLR342W | YLR354C | YLR377C | YML004C | YML054C |
| YML100W | YML126C | YMR083W | YMR099C | YMR105C |
| YMR108W | YMR118C | YMR169C | YMR170C | YMR205C |
| YMR250W | YMR261C | YMR278W | YMR303C | YMR306W |

|         |         |           |         |         |
|---------|---------|-----------|---------|---------|
| YMR323W | YNL009W | YNL037C   | YNL071W | YNL104C |
| YNL106C | YNL117W | YNL192W   | YNL241C | YNL267W |
| YNR001C | YNR016C | YNR034W   | YOL061W | YOL065C |
| YOL086C | YOL126C | YOL136C   | YOL157C | YOR040W |
| YOR095C | YOR109W | YOR136W   | YOR142W | YOR190W |
| YOR347C | YOR374W | YOR388C   | YOR393W | YPL017C |
| YPL028W | YPL061W | YPL262W   | YPL268W | YPR001W |
| YPR002W | YPR006C | YPR026W   | YPR074C | YPR113W |
| YPR160W | YPR184W | YCR073W-A |         |         |

## 2. 297 samples in “Energy Metabolism”

### (I) 151 small molecules

|        |        |        |        |        |        |        |        |
|--------|--------|--------|--------|--------|--------|--------|--------|
| C00001 | C00002 | C00003 | C00004 | C00005 | C00006 | C00007 | C00008 |
| C00009 | C00011 | C00013 | C00014 | C00022 | C00024 | C00025 | C00026 |
| C00033 | C00034 | C00036 | C00037 | C00041 | C00042 | C00048 | C00049 |
| C00053 | C00054 | C00058 | C00059 | C00061 | C00064 | C00065 | C00067 |
| C00074 | C00080 | C00083 | C00085 | C00087 | C00088 | C00091 | C00094 |
| C00097 | C00100 | C00101 | C00111 | C00117 | C00118 | C00122 | C00132 |
| C00143 | C00149 | C00152 | C00155 | C00158 | C00168 | C00169 | C00184 |
| C00192 | C00197 | C00199 | C00218 | C00222 | C00224 | C00227 | C00231 |
| C00232 | C00234 | C00236 | C00237 | C00244 | C00258 | C00263 | C00279 |
| C00282 | C00283 | C00288 | C00311 | C00320 | C00332 | C00354 | C00390 |
| C00399 | C00417 | C00440 | C00445 | C00447 | C00488 | C00533 | C00536 |
| C00542 | C00543 | C00565 | C00593 | C00631 | C00683 | C00697 | C00862 |
| C00876 | C00877 | C00887 | C00894 | C00979 | C00989 | C01001 | C01005 |
| C01011 | C01013 | C01031 | C01046 | C01077 | C01080 | C01104 | C01118 |
| C01144 | C01179 | C01182 | C01213 | C01217 | C01274 | C01330 | C01353 |
| C01417 | C01438 | C01563 | C01861 | C02061 | C02076 | C02185 | C02331 |
| C03232 | C03576 | C03920 | C04330 | C04348 | C04377 | C04488 | C04628 |
| C04732 | C04832 | C05382 | C05528 | C05668 | C06019 | C06027 | C06028 |
| C11062 | C11536 | C11537 | C11903 | C11904 | C14180 | C18323 |        |

### (II) 146 enzymes

|         |         |         |         |         |
|---------|---------|---------|---------|---------|
| Q0045   | Q0065   | Q0070   | Q0080   | Q0085   |
| Q0105   | Q0110   | Q0115   | Q0120   | Q0130   |
| Q0250   | Q0275   | YAL012W | YAL038W | YAL054C |
| YAL062W | YBL045C | YBL099W | YBR011C | YBR039W |
| YBR117C | YBR127C | YBR263W | YCL050C | YCR012W |
| YDL004W | YDL021W | YDL067C | YDL078C | YDL085W |
| YDL168W | YDL171C | YDL185W | YDL215C | YDR019C |
| YDR050C | YDR111C | YDR178W | YDR256C | YDR298C |
| YDR321W | YDR376W | YDR377W | YDR529C | YEL024W |
| YEL027W | YEL051W | YER081W | YFL053W | YFR030W |
| YFR033C | YFR055W | YGL008C | YGL125W | YGL184C |
| YGL187C | YGL191W | YGR012W | YGR020C | YGR088W |

|           |         |           |           |           |
|-----------|---------|-----------|-----------|-----------|
| YGR124W   | YGR183C | YGR208W   | YGR240C   | YGR254W   |
| YHR026W   | YHR051W | YHR174W   | YIL074C   | YIL111W   |
| YJL045W   | YJL068C | YJL121C   | YJL166W   | YJR010W   |
| YJR121W   | YJR130C | YJR137C   | YKL001C   | YKL016C   |
| YKL060C   | YKL080W | YKL085W   | YKL106W   | YKL141W   |
| YKL148C   | YKL152C | YKL192C   | YKR043C   | YKR097W   |
| YLL041C   | YLL058W | YLR027C   | YLR038C   | YLR058C   |
| YLR089C   | YLR153C | YLR155C   | YLR157C   | YLR158C   |
| YLR160C   | YLR164W | YLR295C   | YLR303W   | YLR377C   |
| YLR395C   | YLR447C | YML070W   | YML082W   | YML120C   |
| YMR054W   | YMR118C | YMR145C   | YMR205C   | YMR256C   |
| YMR267W   | YMR323W | YNL052W   | YNL277W   | YOL064C   |
| YOL126C   | YOR065W | YOR095C   | YOR184W   | YOR270C   |
| YOR332W   | YOR347C | YOR375C   | YOR388C   | YOR393W   |
| YPL023C   | YPL036W | YPL078C   | YPL234C   | YPL271W   |
| YPR020W   | YPR035W | YPR036W   | YPR074C   | YPR145W   |
| YPR167C   | YPR191W | YHR001W-A | YHR039C-A | YML081C-A |
| YOL077W-A |         |           |           |           |

### 3. 483 samples in “Lipid Metabolism”

#### (I) 399 small molecules

|        |        |        |        |        |        |        |        |
|--------|--------|--------|--------|--------|--------|--------|--------|
| C00010 | C00024 | C00029 | C00037 | C00065 | C00083 | C00084 | C00093 |
| C00100 | C00111 | C00114 | C00116 | C00136 | C00154 | C00164 | C00184 |
| C00187 | C00189 | C00197 | C00207 | C00219 | C00245 | C00249 | C00258 |
| C00280 | C00307 | C00319 | C00332 | C00346 | C00356 | C00410 | C00412 |
| C00427 | C00448 | C00468 | C00479 | C00489 | C00510 | C00513 | C00517 |
| C00523 | C00527 | C00535 | C00570 | C00577 | C00583 | C00584 | C00588 |
| C00599 | C00639 | C00670 | C00674 | C00695 | C00696 | C00712 | C00735 |
| C00751 | C00762 | C00823 | C00836 | C00877 | C00909 | C00951 | C00969 |
| C01054 | C01089 | C01120 | C01124 | C01144 | C01164 | C01176 | C01189 |
| C01210 | C01226 | C01227 | C01233 | C01301 | C01312 | C01530 | C01561 |
| C01571 | C01595 | C01673 | C01694 | C01724 | C01747 | C01753 | C01780 |
| C01789 | C01794 | C01802 | C01832 | C01902 | C01921 | C01943 | C01944 |
| C01953 | C01996 | C02041 | C02050 | C02140 | C02141 | C02165 | C02166 |
| C02198 | C02249 | C02373 | C02457 | C02528 | C02537 | C02538 | C02593 |
| C02679 | C02934 | C02990 | C03035 | C03205 | C03242 | C03428 | C03547 |
| C03561 | C03577 | C03594 | C03595 | C03640 | C03681 | C03772 | C03845 |
| C03852 | C03872 | C03917 | C03990 | C04042 | C04056 | C04295 | C04373 |
| C04483 | C04518 | C04525 | C04554 | C04555 | C04577 | C04672 | C04676 |
| C04717 | C04722 | C04742 | C04780 | C04785 | C04805 | C04822 | C04853 |
| C05103 | C05107 | C05108 | C05109 | C05122 | C05138 | C05139 | C05140 |
| C05141 | C05259 | C05261 | C05264 | C05267 | C05269 | C05270 | C05272 |
| C05274 | C05275 | C05284 | C05285 | C05290 | C05291 | C05293 | C05294 |
| C05295 | C05296 | C05297 | C05298 | C05299 | C05300 | C05301 | C05302 |

C05337 C05356 C05401 C05437 C05439 C05440 C05441 C05442  
 C05443 C05444 C05445 C05446 C05447 C05448 C05449 C05450  
 C05451 C05452 C05453 C05454 C05455 C05460 C05465 C05466  
 C05467 C05469 C05470 C05471 C05472 C05476 C05479 C05480  
 C05481 C05482 C05484 C05485 C05488 C05490 C05497 C05498  
 C05500 C05501 C05502 C05503 C05504 C05949 C05950 C05951  
 C05952 C05953 C05954 C05956 C05957 C05958 C05959 C05960  
 C05961 C05962 C05963 C05964 C05965 C05966 C05979 C05999  
 C06083 C06124 C06309 C06310 C06314 C06341 C06423 C06424  
 C06425 C06426 C06427 C06428 C06429 C06462 C06771 C06772  
 C07289 C07354 C07880 C08281 C08316 C08320 C08323 C08357  
 C08362 C08491 C08821 C08830 C11133 C11134 C11135 C11455  
 C11508 C11512 C11521 C11522 C11523 C12144 C13482 C13550  
 C13712 C13713 C13809 C14717 C14732 C14748 C14749 C14762  
 C14765 C14766 C14767 C14772 C14773 C14774 C14775 C14776  
 C14777 C14778 C14780 C14781 C14782 C14807 C14808 C14810  
 C14811 C14812 C14813 C14814 C14815 C14822 C14823 C14824  
 C14826 C14827 C14828 C14829 C14831 C14834 C14835 C15515  
 C15517 C15518 C15519 C15520 C15610 C15613 C15776 C15777  
 C15778 C15780 C15781 C15782 C15783 C15808 C15816 C15915  
 C16162 C16300 C16308 C16309 C16310 C16311 C16316 C16317  
 C16319 C16320 C16322 C16331 C16335 C16344 C16345 C16513  
 C16522 C16525 C16526 C16527 C16528 C16529 C16530 C16532  
 C17332 C17333 C17337 C17339 C17343 C17345 C17346 C17644  
 C17647 C17649 C17650 C17654 C17657 C17658 C17660 C17661  
 C17662 C17664 C17667 C17687 C17726 C17727 C17737 C18038  
 C18040 C18041 C18042 C18043 C18044 C18045 C18075

(II) 84 enzymes

YBL011W YBR026C YBR029C YBR145W YBR244W  
 YBR265W YCL004W YCR048W YDL022W YDL052C  
 YDL168W YDR058C YDR062W YDR147W YDR294C  
 YDR402C YER015W YER026C YER061C YER062C  
 YER073W YFL053W YGL001C YGL012W YGL055W  
 YGL205W YGL256W YGR007W YGR060W YGR157W  
 YGR170W YGR175C YGR202C YHL003C YHL032C  
 YHR007C YHR072W YHR104W YHR123W YHR190W  
 YIL009W YIL049W YIL053W YIL124W YIL160C  
 YIR037W YJR019C YKL008C YKL026C YKL182W  
 YKR031C YKR067W YLR100W YLR133W YLR260W  
 YLR299W YML008C YML070W YML126C YMR006C  
 YMR008C YMR083W YMR246W YMR296C YMR303C  
 YNL045W YNL130C YNL169C YNL280C YNR008W  
 YNR016C YNR019W YOL011W YOL059W YOL086C  
 YOR171C YOR175C YOR317W YOR374W YPL028W

YPL061W    YPL206C    YPL231W    YPR113W

#### 4. 240 samples in “Nucleotide Metabolism”

##### (I) 133 small molecules

C00002 C00008 C00011 C00014 C00015 C00020 C00029 C00035  
 C00037 C00044 C00048 C00053 C00054 C00055 C00059 C00063  
 C00064 C00075 C00081 C00086 C00099 C00104 C00105 C00106  
 C00112 C00117 C00119 C00130 C00131 C00144 C00147 C00169  
 C00178 C00206 C00212 C00214 C00224 C00239 C00242 C00262  
 C00286 C00294 C00295 C00299 C00301 C00330 C00337 C00360  
 C00361 C00362 C00363 C00364 C00365 C00366 C00380 C00383  
 C00385 C00387 C00429 C00438 C00458 C00459 C00460 C00475  
 C00499 C00526 C00559 C00575 C00603 C00620 C00655 C00672  
 C00700 C00705 C00802 C00813 C00881 C00906 C00942 C01103  
 C01168 C01228 C01260 C01261 C01345 C01346 C01367 C01368  
 C01762 C02067 C02091 C02170 C02348 C02350 C02353 C02354  
 C02355 C02376 C02642 C02718 C03090 C03373 C03483 C03794  
 C03838 C03997 C04051 C04376 C04494 C04640 C04677 C04734  
 C04751 C04823 C05100 C05145 C05239 C05512 C05513 C05515  
 C05516 C05822 C05993 C06193 C06194 C06195 C06196 C06197  
 C06198 C11821 C12248 C15607 C15667

##### (II) 107 enzymes

YAL038W    YAR015W    YBL039C    YBL068W    YBR111C  
 YBR252W    YBR278W    YCL050C    YCR014C    YDL102W  
 YDL140C    YDL150W    YDL238C    YDR045C    YDR121W  
 YDR156W    YDR226W    YDR353W    YDR408C    YDR419W  
 YDR441C    YDR454C    YDR530C    YEL021W    YEL055C  
 YER005W    YER070W    YER099C    YER170W    YFL036W  
 YGL063W    YGL234W    YGL248W    YGR061C    YGR180C  
 YHL011C    YHR106W    YHR128W    YHR144C    YHR201C  
 YHR216W    YIL066C    YIL139C    YIR027C    YIR029W  
 YIR032C    YJL005W    YJL026W    YJL130C    YJL148W  
 YJR010W    YJR057W    YJR063W    YJR103W    YJR105W  
 YJR109C    YKL001C    YKL024C    YKL067W    YKL127W  
 YKL144C    YKL181W    YKL216W    YLR028C    YLR209C  
 YLR245C    YLR359W    YLR420W    YLR432W    YML022W  
 YML035C    YML056C    YML106W    YMR105C    YMR120C  
 YMR217W    YMR271C    YMR278W    YMR300C    YNL102W  
 YNL113W    YNL141W    YNL151C    YNL220W    YNL248C  
 YNL262W    YNR003C    YNR012W    YOL061W    YOL115W  
 YOR074C    YOR116C    YOR128C    YOR151C    YOR207C  
 YOR303W    YOR330C    YOR340C    YOR341W    YOR347C  
 YOR360C    YPL167C    YPR010C    YPR062W    YPR110C  
 YPR175W    YPR190C

## 5. 647 samples in “Amino Acid Metabolism”

## (I) 489 small molecules

|        |        |        |        |        |        |        |        |
|--------|--------|--------|--------|--------|--------|--------|--------|
| C00011 | C00014 | C00019 | C00021 | C00022 | C00024 | C00025 | C00026 |
| C00036 | C00037 | C00041 | C00042 | C00047 | C00048 | C00049 | C00051 |
| C00059 | C00062 | C00064 | C00065 | C00068 | C00073 | C00074 | C00077 |
| C00078 | C00079 | C00082 | C00083 | C00084 | C00086 | C00091 | C00094 |
| C00097 | C00100 | C00101 | C00108 | C00109 | C00114 | C00119 | C00122 |
| C00123 | C00134 | C00135 | C00141 | C00143 | C00146 | C00148 | C00152 |
| C00155 | C00156 | C00164 | C00166 | C00168 | C00169 | C00170 | C00179 |
| C00180 | C00183 | C00188 | C00197 | C00213 | C00223 | C00230 | C00232 |
| C00233 | C00251 | C00254 | C00258 | C00263 | C00279 | C00283 | C00296 |
| C00300 | C00315 | C00320 | C00322 | C00323 | C00327 | C00328 | C00331 |
| C00332 | C00334 | C00352 | C00355 | C00356 | C00388 | C00398 | C00402 |
| C00406 | C00407 | C00408 | C00409 | C00423 | C00430 | C00431 | C00433 |
| C00436 | C00437 | C00438 | C00439 | C00441 | C00449 | C00450 | C00463 |
| C00483 | C00487 | C00489 | C00491 | C00493 | C00506 | C00512 | C00527 |
| C00530 | C00533 | C00544 | C00546 | C00547 | C00555 | C00576 | C00581 |
| C00582 | C00596 | C00601 | C00606 | C00624 | C00628 | C00630 | C00632 |
| C00637 | C00642 | C00643 | C00666 | C00671 | C00680 | C00683 | C00719 |
| C00739 | C00740 | C00750 | C00755 | C00763 | C00780 | C00785 | C00788 |
| C00791 | C00793 | C00805 | C00811 | C00822 | C00826 | C00860 | C00877 |
| C00884 | C00940 | C00944 | C00954 | C00955 | C00956 | C00957 | C00978 |
| C00979 | C00986 | C00990 | C01005 | C01010 | C01026 | C01028 | C01035 |
| C01036 | C01042 | C01043 | C01044 | C01045 | C01060 | C01061 | C01077 |
| C01100 | C01102 | C01110 | C01118 | C01137 | C01142 | C01144 | C01149 |
| C01152 | C01157 | C01161 | C01165 | C01179 | C01180 | C01181 | C01186 |
| C01198 | C01207 | C01213 | C01234 | C01250 | C01251 | C01252 | C01259 |
| C01262 | C01267 | C01269 | C01302 | C01575 | C01586 | C01598 | C01672 |
| C01682 | C01693 | C01717 | C01772 | C01817 | C01829 | C01850 | C01877 |
| C01888 | C01929 | C01962 | C01987 | C02043 | C02137 | C02161 | C02167 |
| C02170 | C02172 | C02218 | C02220 | C02226 | C02265 | C02291 | C02298 |
| C02305 | C02362 | C02442 | C02465 | C02470 | C02504 | C02505 | C02514 |
| C02515 | C02565 | C02612 | C02631 | C02637 | C02647 | C02693 | C02700 |
| C02714 | C02727 | C02739 | C02741 | C02763 | C02765 | C02775 | C02835 |
| C02937 | C02938 | C02939 | C02946 | C02989 | C03063 | C03069 | C03077 |
| C03078 | C03082 | C03087 | C03089 | C03090 | C03145 | C03166 | C03175 |
| C03194 | C03227 | C03230 | C03231 | C03232 | C03239 | C03273 | C03277 |
| C03283 | C03284 | C03287 | C03296 | C03340 | C03344 | C03345 | C03375 |
| C03406 | C03415 | C03440 | C03453 | C03460 | C03506 | C03508 | C03519 |
| C03539 | C03564 | C03589 | C03656 | C03672 | C03680 | C03722 | C03758 |
| C03765 | C03771 | C03793 | C03794 | C03824 | C03871 | C03912 | C03955 |
| C03972 | C04002 | C04020 | C04043 | C04044 | C04045 | C04052 | C04076 |
| C04092 | C04133 | C04137 | C04148 | C04185 | C04186 | C04188 | C04236 |
| C04272 | C04281 | C04282 | C04302 | C04368 | C04390 | C04405 | C04409 |

C04411 C04421 C04462 C04479 C04498 C04582 C04642 C04666  
 C04677 C04691 C04877 C04882 C04896 C04916 C05125 C05127  
 C05130 C05135 C05161 C05235 C05332 C05338 C05519 C05527  
 C05528 C05539 C05548 C05554 C05565 C05568 C05570 C05572  
 C05575 C05576 C05577 C05578 C05579 C05580 C05581 C05582  
 C05583 C05584 C05585 C05587 C05588 C05589 C05593 C05594  
 C05598 C05600 C05604 C05607 C05620 C05629 C05634 C05635  
 C05637 C05638 C05639 C05640 C05642 C05643 C05645 C05646  
 C05651 C05653 C05658 C05659 C05660 C05662 C05663 C05823  
 C05824 C05827 C05828 C05829 C05830 C05831 C05834 C05837  
 C05852 C05853 C05931 C05932 C05933 C05936 C05939 C05942  
 C05945 C05946 C05947 C06000 C06001 C06002 C06006 C06007  
 C06010 C06032 C06044 C06046 C06047 C06048 C06181 C06199  
 C06212 C06213 C06231 C06442 C06547 C06866 C07086 C07303  
 C08276 C08300 C08301 C09306 C10447 C10497 C11457 C11481  
 C11588 C12621 C12623 C12986 C12987 C12988 C12989 C15524  
 C15532 C15606 C15650 C15651 C15699 C15700 C15767 C15980  
 C16069 C16432 C16666 C16673 C16719 C16848 C16850 C17203  
 C17268 C17935 C17938 C18048 C18172 C18174 C18202 C18325  
 C18326

(II) 158 enzymes

|         |         |         |         |         |
|---------|---------|---------|---------|---------|
| YAL012W | YAL062W | YBL076C | YBL098W | YBR006W |
| YBR115C | YBR145W | YBR166C | YBR208C | YBR221C |
| YBR249C | YBR263W | YCL009C | YCL018W | YCL030C |
| YCL064C | YCR053W | YDL131W | YDL168W | YDL171C |
| YDL182W | YDL215C | YDR007W | YDR019C | YDR035W |
| YDR111C | YDR127W | YDR148C | YDR158W | YDR232W |
| YDR234W | YDR242W | YDR256C | YDR268W | YDR300C |
| YDR321W | YDR354W | YDR402C | YDR440W | YDR502C |
| YEL038W | YEL046C | YER023W | YER026C | YER043C |
| YER052C | YER055C | YER069W | YER073W | YER081W |
| YER086W | YER090W | YER091C | YER178W | YFL018C |
| YFR025C | YFR055W | YGL009C | YGL026C | YGL148W |
| YGL184C | YGL202W | YGL256W | YGR012W | YGR019W |
| YGR088W | YGR094W | YGR124W | YGR155W | YGR208W |
| YHR018C | YHR025W | YHR037W | YHR119W | YHR137W |
| YHR208W | YIL020C | YIL074C | YIL094C | YIL116W |
| YIL125W | YIL160C | YIR034C | YJL088W | YJL130C |
| YJL168C | YJR016C | YJR024C | YJR025C | YJR078W |
| YJR109C | YJR130C | YJR139C | YJR148W | YKL104C |
| YKL106W | YKL184W | YKL211C | YLL058W | YLR017W |
| YLR027C | YLR058C | YLR089C | YLR134W | YLR142W |
| YLR146C | YLR155C | YLR157C | YLR158C | YLR160C |
| YLR180W | YLR231C | YLR303W | YLR355C | YLR359W |



|         |         |         |         |         |
|---------|---------|---------|---------|---------|
| YLR382C | YLR438W | YML082W | YML126C | YMR009W |
| YMR062C | YMR083W | YMR108W | YMR169C | YMR170C |
| YMR189W | YMR250W | YMR300C | YMR303C | YNL104C |
| YNL220W | YNL277W | YNL316C | YNR050C | YOL052C |
| YOL058W | YOL086C | YOL097C | YOL140W | YOR184W |
| YOR202W | YOR251C | YOR303W | YOR323C | YOR374W |
| YOR375C | YPL017C | YPL028W | YPL040C | YPL061W |
| YPL111W | YPL160W | YPR035W | YPR060C | YPR062W |
| YPR069C | YPR118W | YPR145W |         |         |

## 6. 200 samples in “Metabolism of Other Amino Acids”

### (I) 156 small molecules

|        |        |        |        |        |        |        |        |
|--------|--------|--------|--------|--------|--------|--------|--------|
| C00005 | C00006 | C00011 | C00014 | C00022 | C00024 | C00025 | C00026 |
| C00033 | C00037 | C00041 | C00049 | C00051 | C00062 | C00064 | C00065 |
| C00072 | C00074 | C00077 | C00082 | C00083 | C00084 | C00094 | C00097 |
| C00099 | C00100 | C00106 | C00127 | C00133 | C00134 | C00135 | C00152 |
| C00177 | C00189 | C00217 | C00222 | C00227 | C00245 | C00302 | C00315 |
| C00334 | C00383 | C00429 | C00488 | C00506 | C00515 | C00519 | C00555 |
| C00593 | C00606 | C00650 | C00669 | C00692 | C00736 | C00750 | C00792 |
| C00804 | C00819 | C00864 | C00894 | C00986 | C00993 | C01013 | C01050 |
| C01073 | C01110 | C01212 | C01262 | C01326 | C01401 | C01419 | C01528 |
| C01594 | C01672 | C01678 | C01855 | C01879 | C01959 | C02090 | C02237 |
| C02335 | C02512 | C02535 | C02642 | C02659 | C02798 | C03149 | C03167 |
| C03170 | C03341 | C03557 | C03564 | C03646 | C03722 | C03742 | C03771 |
| C03943 | C04353 | C05042 | C05122 | C05123 | C05143 | C05172 | C05335 |
| C05341 | C05422 | C05665 | C05668 | C05669 | C05670 | C05672 | C05679 |
| C05680 | C05682 | C05684 | C05686 | C05688 | C05689 | C05695 | C05697 |
| C05698 | C05699 | C05703 | C05711 | C05714 | C05730 | C05844 | C06367 |
| C06368 | C06451 | C06452 | C06454 | C06455 | C06456 | C06457 | C06459 |
| C06735 | C08325 | C14179 | C16074 | C16075 | C16562 | C16563 | C16564 |
| C16565 | C16566 | C16567 | C17940 | C17942 | C17944 | C17946 | C17947 |
| C17949 | C17951 | C17952 | C17962 |        |        |        |        |

### (II) 44 enzymes

|         |         |         |         |         |
|---------|---------|---------|---------|---------|
| YBL064C | YBR244W | YBR263W | YDL066W | YDR242W |
| YDR321W | YDR453C | YER070W | YER073W | YGR007W |
| YGR019W | YGR180C | YGR202C | YGR256W | YHR123W |
| YHR183W | YIL010W | YIL066C | YIL145C | YIR037W |
| YJL026W | YJL101C | YKL026C | YKL184W | YKL215C |
| YLR058C | YLR109W | YLR146C | YLR155C | YLR157C |
| YLR158C | YLR160C | YLR174W | YLR299W | YML028W |
| YMR250W | YNL009W | YNL130C | YNL241C | YOL049W |
| YOR374W | YPL061W | YPL091W | YPR069C |         |

## 7. 65 samples in “Glycan Biosynthesis and Metabolism”

## (I) 47 small molecules

C00009 C00033 C00043 C00053 C00054 C00096 C00105 C00110  
 C00133 C00154 C00381 C00621 C00692 C00993 C01050 C01112  
 C01187 C01212 C01246 C03862 C04121 C04478 C04574 C04631  
 C04652 C04738 C04824 C04877 C04882 C04919 C04932 C05382  
 C05892 C05897 C05898 C06022 C06024 C06025 C06026 C06251  
 C06397 C06398 C07836 C07838 C11472 C17556 C17558

## (II) 18 enzymes

YBL082C YBR070C YBR110W YBR229C YBR243C  
 YGL022W YGL027C YGL047W YGL065C YGL156W  
 YGR036C YJR131W YMR013C YMR281W YNR030W  
 YPL175W YPL227C YPR183W

## 8. 437 samples in “Metabolism of Cofactors and Vitamins”

## (I) 350 small molecules

C00001 C00003 C00006 C00007 C00010 C00016 C00018 C00022  
 C00025 C00026 C00032 C00037 C00044 C00047 C00049 C00054  
 C00061 C00068 C00082 C00097 C00099 C00101 C00106 C00111  
 C00118 C00120 C00122 C00133 C00141 C00143 C00153 C00156  
 C00163 C00183 C00188 C00194 C00199 C00217 C00223 C00232  
 C00234 C00250 C00251 C00253 C00255 C00266 C00268 C00272  
 C00279 C00314 C00341 C00376 C00378 C00399 C00415 C00429  
 C00430 C00440 C00445 C00455 C00472 C00473 C00474 C00486  
 C00500 C00504 C00522 C00530 C00534 C00541 C00544 C00568  
 C00627 C00647 C00664 C00725 C00748 C00777 C00811 C00828  
 C00831 C00847 C00853 C00857 C00864 C00882 C00885 C00899  
 C00900 C00921 C00922 C00931 C00966 C00971 C00992 C01004  
 C01020 C01024 C01037 C01051 C01056 C01059 C01063 C01079  
 C01081 C01092 C01134 C01179 C01185 C01215 C01217 C01230  
 C01268 C01270 C01279 C01297 C01300 C01304 C01352 C01384  
 C01596 C01727 C01847 C01894 C01909 C01967 C02059 C02094  
 C02110 C02139 C02191 C02295 C02463 C02469 C02477 C02483  
 C02588 C02642 C02656 C02691 C02730 C02800 C02823 C02880  
 C02892 C02918 C02930 C02949 C03028 C03043 C03056 C03114  
 C03150 C03160 C03194 C03263 C03373 C03393 C03455 C03458  
 C03479 C03492 C03516 C03541 C03652 C03657 C03672 C03684  
 C03722 C03741 C03885 C04039 C04079 C04122 C04145 C04146  
 C04226 C04244 C04294 C04327 C04332 C04352 C04454 C04536  
 C04556 C04604 C04732 C04752 C04773 C04778 C04807 C04874  
 C04895 C05200 C05306 C05307 C05313 C05380 C05427 C05552  
 C05766 C05767 C05768 C05769 C05770 C05772 C05773 C05774  
 C05775 C05777 C05778 C05786 C05787 C05789 C05790 C05791  
 C05793 C05794 C05795 C05797 C05798 C05802 C05804 C05805  
 C05807 C05809 C05810 C05811 C05812 C05813 C05814 C05815

C05817 C05818 C05840 C05841 C05842 C05843 C05847 C05848  
 C05856 C05912 C05913 C05921 C05924 C05925 C05926 C05944  
 C06051 C06052 C06054 C06055 C06056 C06178 C06319 C06320  
 C06399 C06406 C06407 C06408 C06416 C06503 C06504 C06505  
 C06506 C06507 C06508 C06509 C06510 C06986 C07335 C09332  
 C10385 C10793 C11061 C11242 C11355 C11437 C11538 C11539  
 C11540 C11542 C11543 C11545 C11630 C11638 C11829 C11830  
 C11831 C11832 C11850 C11851 C12147 C13309 C13425 C14151  
 C14152 C14818 C14819 C15492 C15493 C15523 C15547 C15556  
 C15563 C15670 C15672 C15809 C15882 C15883 C15986 C15987  
 C16150 C16151 C16159 C16238 C16242 C16243 C16244 C16390  
 C16519 C16541 C16677 C16678 C16680 C16681 C16682 C16683  
 C16999 C17018 C17401 C17432 C17551 C17554 C17561 C17562  
 C17568 C17569 C17570 C18021 C18022 C18064 C18098 C18131  
 C18133 C18134 C18154 C18155 C18157 C18239

(II) 87 enzymes

YAR071W YBL013W YBL033C YBR035C YBR084W  
 YBR092C YBR093C YBR145W YBR153W YBR176W  
 YBR213W YBR256C YBR263W YCL009C YCL017C  
 YCR053W YDL024C YDL045C YDL141W YDL168W  
 YDL205C YDR019C YDR044W YDR047W YDR196C  
 YDR232W YDR236C YDR402C YDR408C YDR481C  
 YDR487C YDR531W YEL029C YER014W YER183C  
 YFR047C YGL037C YGL040C YGL125W YGL245W  
 YGL256W YGR010W YGR204W YGR267C YGR286C  
 YHR063C YHR074W YHR208W YHR215W YIL145C  
 YJL046W YJR016C YJR148W YKR069W YKR080W  
 YLR028C YLR058C YLR209C YLR239C YLR328W  
 YLR355C YMR083W YMR108W YMR120C YMR303C  
 YNL256W YNR027W YNR033W YNR057C YNR058W  
 YOL033W YOL055C YOL086C YOL096C YOR074C  
 YOR143C YOR176W YOR184W YOR196C YOR209C  
 YOR236W YOR278W YPL023C YPL214C YPL258C  
 YPR073C YPR127W

9. 525 samples in “Metabolism of Terpenoids and Polyketides”

(I) 507 small molecules

C00002 C00008 C00015 C00019 C00020 C00022 C00024 C00029  
 C00033 C00061 C00082 C00083 C00100 C00103 C00118 C00129  
 C00136 C00147 C00170 C00187 C00190 C00196 C00235 C00251  
 C00332 C00341 C00353 C00356 C00371 C00400 C00418 C00448  
 C00477 C00521 C00553 C00621 C00630 C00688 C00744 C00805  
 C00842 C00843 C00859 C00885 C00964 C00979 C01033 C01107  
 C01123 C01126 C01143 C01164 C01179 C01230 C01414 C01433

|        |        |        |        |        |        |        |        |
|--------|--------|--------|--------|--------|--------|--------|--------|
| C01457 | C01499 | C01500 | C01512 | C01513 | C01661 | C01699 | C01767 |
| C01789 | C01804 | C01841 | C01847 | C01848 | C01852 | C01860 | C01907 |
| C01912 | C01920 | C01946 | C02004 | C02029 | C02034 | C02035 | C02094 |
| C02344 | C02400 | C02452 | C02462 | C02485 | C02513 | C02557 | C02576 |
| C02633 | C02811 | C03069 | C03190 | C03198 | C03220 | C03240 | C03319 |
| C03423 | C03461 | C03579 | C03590 | C04083 | C04145 | C04146 | C04171 |
| C04216 | C04268 | C04435 | C04574 | C04713 | C05413 | C05414 | C05427 |
| C05430 | C05431 | C05432 | C05433 | C05434 | C05435 | C05821 | C05859 |
| C06069 | C06071 | C06074 | C06076 | C06082 | C06087 | C06088 | C06089 |
| C06090 | C06091 | C06092 | C06093 | C06094 | C06095 | C06098 | C06099 |
| C06111 | C06307 | C06308 | C06394 | C06570 | C06571 | C06616 | C06624 |
| C06627 | C06630 | C06633 | C06634 | C06635 | C06654 | C06691 | C06769 |
| C06801 | C07271 | C07276 | C07277 | C07330 | C07394 | C07667 | C08579 |
| C08583 | C08584 | C08585 | C08586 | C08590 | C08591 | C08592 | C08601 |
| C08606 | C08614 | C08814 | C09094 | C09118 | C09183 | C09190 | C09621 |
| C09629 | C09665 | C09666 | C09672 | C09684 | C09694 | C09699 | C09704 |
| C09707 | C09723 | C09769 | C09844 | C09847 | C09848 | C09849 | C09871 |
| C09880 | C09884 | C09893 | C11383 | C11384 | C11386 | C11388 | C11389 |
| C11393 | C11395 | C11398 | C11402 | C11403 | C11405 | C11406 | C11407 |
| C11408 | C11409 | C11410 | C11411 | C11412 | C11413 | C11414 | C11415 |
| C11416 | C11417 | C11418 | C11419 | C11421 | C11434 | C11435 | C11436 |
| C11437 | C11453 | C11636 | C11672 | C11673 | C11700 | C11811 | C11853 |
| C11854 | C11855 | C11857 | C11858 | C11859 | C11860 | C11861 | C11862 |
| C11863 | C11864 | C11865 | C11867 | C11868 | C11869 | C11870 | C11871 |
| C11872 | C11873 | C11874 | C11875 | C11878 | C11879 | C11880 | C11881 |
| C11882 | C11883 | C11887 | C11889 | C11893 | C11894 | C11895 | C11897 |
| C11900 | C11901 | C11902 | C11907 | C11908 | C11911 | C11912 | C11916 |
| C11918 | C11920 | C11921 | C11924 | C11933 | C11938 | C11939 | C11940 |
| C11941 | C11942 | C11943 | C11944 | C11945 | C11946 | C11950 | C11951 |
| C11952 | C11967 | C11971 | C11983 | C11989 | C11990 | C11993 | C11994 |
| C11995 | C11996 | C11997 | C12000 | C12002 | C12014 | C12026 | C12037 |
| C12038 | C12044 | C12077 | C12106 | C12107 | C12108 | C12109 | C12142 |
| C12176 | C12210 | C12212 | C12213 | C12214 | C12215 | C12216 | C12219 |
| C12220 | C12221 | C12246 | C12247 | C12319 | C12321 | C12323 | C12324 |
| C12325 | C12366 | C12367 | C12368 | C12369 | C12370 | C12371 | C12376 |
| C12378 | C12379 | C12381 | C12382 | C12383 | C12384 | C12387 | C12388 |
| C12389 | C12390 | C12391 | C12392 | C12393 | C12395 | C12396 | C12397 |
| C12398 | C12399 | C12400 | C12401 | C12402 | C12404 | C12406 | C12412 |
| C12413 | C12414 | C12415 | C12416 | C12417 | C12419 | C12420 | C12421 |
| C12422 | C12423 | C12424 | C12425 | C12426 | C12427 | C12428 | C12429 |
| C12430 | C12432 | C12434 | C12435 | C12436 | C12451 | C13273 | C13431 |
| C13433 | C13453 | C13454 | C13455 | C13456 | C14540 | C14721 | C14722 |
| C15514 | C15545 | C15546 | C15784 | C15785 | C15786 | C15787 | C15788 |
| C15789 | C15790 | C15791 | C15792 | C15793 | C15794 | C15795 | C15797 |

C15798 C15799 C15800 C15801 C15802 C15803 C15859 C15860  
 C15870 C15874 C15877 C15878 C15881 C15885 C15886 C15888  
 C15892 C15895 C15898 C15900 C15902 C15903 C15908 C15943  
 C15965 C15966 C15967 C15968 C15969 C15970 C15971 C15981  
 C16028 C16141 C16142 C16143 C16144 C16145 C16146 C16147  
 C16148 C16251 C16269 C16270 C16276 C16280 C16282 C16284  
 C16286 C16291 C16340 C16427 C16430 C16431 C16441 C16447  
 C16448 C16449 C16461 C16462 C16464 C16470 C16493 C16494  
 C16495 C16496 C16497 C16499 C16500 C16502 C16503 C16504  
 C16521 C16523 C16826 C16829 C17277 C17432 C17621 C17622  
 C17733 C17735 C17953 C17954 C18015 C18025 C18037 C18211  
 C18221 C18222 C18223 C18224 C18225 C18226 C18227 C18228  
 C18229 C18295 C18297

(II) 18 enzymes

YBR117C YER073W YIL160C YJL167W YLR450W  
 YML075C YML126C YMR208W YMR220W YNR016C  
 YNR043W YOR274W YOR374W YPL028W YPL061W  
 YPL069C YPL117C YPR074C

10. 526 samples in “Biosynthesis of Other Secondary Metabolites”

(I) 509 small molecules

C00002 C00025 C00031 C00043 C00047 C00048 C00061 C00062  
 C00073 C00078 C00079 C00082 C00092 C00097 C00103 C00108  
 C00118 C00123 C00132 C00134 C00137 C00141 C00148 C00166  
 C00183 C00223 C00233 C00253 C00254 C00315 C00323 C00355  
 C00385 C00389 C00398 C00406 C00407 C00408 C00411 C00413  
 C00423 C00450 C00463 C00482 C00483 C00509 C00540 C00590  
 C00616 C00671 C00688 C00691 C00729 C00745 C00757 C00761  
 C00783 C00786 C00811 C00814 C00822 C00842 C00852 C00858  
 C00903 C00916 C00933 C00956 C00974 C01091 C01121 C01138  
 C01179 C01180 C01197 C01214 C01221 C01263 C01265 C01283  
 C01294 C01298 C01378 C01416 C01441 C01456 C01460 C01470  
 C01477 C01479 C01494 C01514 C01516 C01527 C01533 C01562  
 C01610 C01617 C01672 C01701 C01709 C01735 C01737 C01743  
 C01745 C01746 C01752 C01759 C01761 C01762 C01772 C01795  
 C01847 C01851 C01852 C02046 C02066 C02074 C02105 C02106  
 C02134 C02151 C02153 C02325 C02495 C02621 C02627 C02646  
 C02666 C02673 C02675 C02723 C02887 C02890 C02906 C02916  
 C02920 C02937 C02947 C02954 C03005 C03112 C03219 C03239  
 C03319 C03329 C03442 C03470 C03506 C03515 C03567 C03582  
 C03648 C03719 C03758 C03765 C03882 C03951 C04006 C04043  
 C04076 C04092 C04118 C04271 C04280 C04293 C04353 C04443  
 C04444 C04608 C04673 C04767 C04831 C04858 C05080 C05158  
 C05174 C05175 C05176 C05177 C05178 C05179 C05189 C05191

C05193 C05194 C05202 C05220 C05243 C05315 C05316 C05376  
 C05556 C05557 C05587 C05604 C05607 C05608 C05610 C05619  
 C05623 C05625 C05627 C05631 C05837 C05838 C05851 C05901  
 C05903 C05904 C05905 C05906 C05907 C05908 C05909 C05911  
 C06160 C06161 C06162 C06165 C06167 C06171 C06172 C06173  
 C06174 C06175 C06176 C06177 C06178 C06179 C06180 C06181  
 C06182 C06183 C06185 C06224 C06327 C06366 C06511 C06516  
 C06520 C06521 C06524 C06533 C06561 C06562 C06563 C06564  
 C06565 C06566 C06568 C06569 C06655 C06656 C06657 C06658  
 C06659 C06660 C06661 C06662 C07026 C07031 C07032 C07130  
 C07201 C07204 C07304 C07307 C07475 C07480 C07481 C07592  
 C07593 C07756 C08401 C08409 C08412 C08417 C08426 C08526  
 C08532 C08537 C08538 C08539 C08540 C08543 C08544 C08552  
 C08557 C08565 C08578 C08604 C08620 C08639 C08641 C08650  
 C08725 C09024 C09099 C09126 C09239 C09244 C09248 C09320  
 C09328 C09330 C09337 C09390 C09421 C09581 C09614 C09727  
 C09751 C09756 C09762 C09789 C09806 C09826 C09827 C10028  
 C10044 C10098 C10107 C10126 C10171 C10173 C10192 C10200  
 C10205 C10208 C10216 C10434 C10462 C10502 C10503 C10509  
 C10516 C10520 C10521 C10522 C10538 C10632 C10738 C10773  
 C10783 C10850 C10858 C10860 C10865 C10945 C11130 C11250  
 C11351 C11620 C11632 C11633 C11634 C11635 C11641 C11643  
 C11675 C11676 C11677 C11678 C11679 C11680 C11682 C11783  
 C11807 C11808 C11809 C11810 C11812 C11813 C11814 C11816  
 C11817 C11907 C12032 C12092 C12093 C12096 C12123 C12125  
 C12127 C12128 C12134 C12136 C12137 C12138 C12139 C12140  
 C12141 C12162 C12173 C12203 C12204 C12205 C12206 C12208  
 C12249 C12312 C12440 C12449 C12452 C12453 C12454 C12455  
 C12456 C12457 C12458 C12468 C12473 C12474 C12476 C12477  
 C12480 C12626 C12631 C12633 C12634 C12640 C12643 C12644  
 C12646 C12647 C13747 C14314 C14536 C15509 C15525 C15530  
 C15567 C15612 C15666 C15769 C15770 C15772 C16075 C16187  
 C16190 C16191 C16192 C16195 C16197 C16222 C16223 C16225  
 C16226 C16228 C16229 C16230 C16232 C16299 C16303 C16306  
 C16315 C16352 C16353 C16355 C16356 C16357 C16358 C16359  
 C16360 C16361 C16362 C16363 C16364 C16365 C16366 C16404  
 C16406 C16416 C16417 C16418 C16419 C16422 C16700 C16709  
 C16710 C16712 C17209 C17213 C17217 C17221 C17235 C17239  
 C17245 C17246 C17250 C17254 C17580 C17581 C17582 C17585  
 C17591 C17592 C17742 C17743 C17746 C17749 C17750 C17753  
 C17754 C17755 C17756 C17757 C18004

(II) 17 enzymes

YCL040W YDR287W YDR402C YFR053C YGL202W  
 YGL253W YHR046C YHR137W YHR208W YIL116W

YJL153C YJR148W YKL106W YKL127W YLR027C  
YMR105C YMR278W

## 11. 730 samples in “Xenobiotics Biodegradation and Metabolism”

### (I) 709 small molecules

C00011 C00022 C00024 C00036 C00042 C00048 C00058 C00067  
C00084 C00086 C00090 C00091 C00108 C00122 C00146 C00156  
C00160 C00163 C00164 C00180 C00186 C00196 C00209 C00222  
C00230 C00237 C00261 C00292 C00332 C00414 C00472 C00479  
C00511 C00512 C00527 C00530 C00544 C00556 C00568 C00571  
C00587 C00596 C00601 C00628 C00632 C00633 C00682 C00755  
C00805 C00827 C00829 C00846 C00854 C00870 C00877 C00894  
C01010 C01036 C01061 C01063 C01108 C01144 C01147 C01163  
C01198 C01273 C01278 C01380 C01407 C01424 C01454 C01455  
C01467 C01468 C01471 C01504 C01516 C01542 C01548 C01566  
C01606 C01659 C01751 C01880 C01983 C01984 C01987 C01998  
C02083 C02124 C02137 C02183 C02222 C02235 C02236 C02247  
C02271 C02274 C02357 C02359 C02364 C02370 C02371 C02372  
C02375 C02378 C02380 C02411 C02480 C02501 C02505 C02519  
C02526 C02575 C02617 C02625 C02720 C02734 C02802 C02814  
C02824 C02909 C02923 C02933 C02949 C03012 C03057 C03067  
C03077 C03164 C03198 C03203 C03223 C03233 C03351 C03360  
C03434 C03453 C03569 C03572 C03585 C03586 C03589 C03590  
C03664 C03671 C03676 C03739 C03824 C03918 C03925 C04091  
C04112 C04115 C04178 C04242 C04314 C04324 C04431 C04434  
C04451 C04468 C04484 C04522 C04553 C04558 C04559 C04592  
C04596 C04623 C04646 C04706 C04729 C04783 C05011 C05165  
C05361 C05375 C05593 C05616 C05618 C05852 C06002 C06033  
C06102 C06103 C06104 C06105 C06174 C06202 C06203 C06204  
C06205 C06206 C06210 C06317 C06318 C06321 C06322 C06328  
C06329 C06333 C06335 C06336 C06337 C06387 C06547 C06548  
C06551 C06552 C06553 C06554 C06555 C06556 C06557 C06558  
C06559 C06560 C06575 C06576 C06577 C06578 C06579 C06580  
C06581 C06582 C06584 C06588 C06589 C06593 C06594 C06596  
C06597 C06598 C06599 C06600 C06601 C06602 C06603 C06604  
C06605 C06606 C06607 C06608 C06609 C06610 C06611 C06612  
C06613 C06614 C06636 C06637 C06638 C06639 C06640 C06641  
C06642 C06643 C06647 C06648 C06650 C06670 C06671 C06672  
C06673 C06674 C06675 C06676 C06677 C06678 C06679 C06680  
C06711 C06712 C06714 C06715 C06719 C06723 C06728 C06730  
C06749 C06752 C06753 C06754 C06755 C06756 C06757 C06758  
C06760 C06762 C06789 C06790 C06791 C06792 C06793 C06813  
C06837 C06868 C06876 C06899 C06988 C06989 C06990 C07047  
C07054 C07073 C07075 C07083 C07084 C07085 C07086 C07088

|        |        |        |        |        |        |        |        |
|--------|--------|--------|--------|--------|--------|--------|--------|
| C07089 | C07090 | C07091 | C07092 | C07093 | C07094 | C07095 | C07096 |
| C07097 | C07098 | C07099 | C07100 | C07101 | C07102 | C07103 | C07108 |
| C07111 | C07113 | C07114 | C07118 | C07163 | C07185 | C07189 | C07208 |
| C07209 | C07211 | C07212 | C07213 | C07214 | C07215 | C07216 | C07446 |
| C07447 | C07490 | C07492 | C07493 | C07495 | C07496 | C07501 | C07535 |
| C07557 | C07572 | C07585 | C07643 | C07644 | C07645 | C07646 | C07647 |
| C07648 | C07649 | C07715 | C07720 | C07723 | C07727 | C07728 | C07729 |
| C07731 | C07732 | C07888 | C08012 | C08060 | C08061 | C08063 | C08733 |
| C08734 | C08735 | C08737 | C09811 | C09812 | C09813 | C09814 | C09815 |
| C09816 | C09817 | C09818 | C09819 | C09820 | C09821 | C09822 | C09823 |
| C10700 | C10833 | C11004 | C11006 | C11036 | C11057 | C11088 | C11148 |
| C11149 | C11150 | C11173 | C11249 | C11272 | C11348 | C11376 | C11422 |
| C11427 | C11429 | C11430 | C11432 | C11433 | C11519 | C11520 | C11713 |
| C11714 | C11736 | C11785 | C12313 | C12650 | C12673 | C12739 | C12831 |
| C12833 | C12834 | C12835 | C12836 | C12837 | C12838 | C13620 | C13621 |
| C13622 | C13623 | C13624 | C13625 | C13626 | C13628 | C13629 | C13631 |
| C13632 | C13633 | C13634 | C13635 | C13636 | C13637 | C13638 | C14039 |
| C14040 | C14082 | C14088 | C14089 | C14090 | C14091 | C14093 | C14096 |
| C14097 | C14098 | C14099 | C14101 | C14103 | C14110 | C14111 | C14113 |
| C14114 | C14115 | C14116 | C14117 | C14120 | C14143 | C14144 | C14145 |
| C14147 | C14220 | C14298 | C14315 | C14335 | C14401 | C14418 | C14419 |
| C14450 | C14453 | C14519 | C14556 | C14573 | C14602 | C14604 | C14610 |
| C14783 | C14785 | C14786 | C14787 | C14788 | C14789 | C14790 | C14839 |
| C14840 | C14841 | C14842 | C14843 | C14844 | C14849 | C14850 | C14851 |
| C14852 | C14853 | C14854 | C14857 | C14858 | C14859 | C14862 | C14863 |
| C14864 | C14866 | C14867 | C14868 | C14869 | C14870 | C14871 | C14872 |
| C14873 | C14875 | C14876 | C14877 | C16074 | C16075 | C16181 | C16182 |
| C16193 | C16194 | C16199 | C16200 | C16201 | C16202 | C16204 | C16206 |
| C16207 | C16208 | C16209 | C16211 | C16212 | C16213 | C16215 | C16234 |
| C16235 | C16246 | C16247 | C16248 | C16262 | C16266 | C16267 | C16268 |
| C16272 | C16273 | C16281 | C16283 | C16348 | C16391 | C16392 | C16393 |
| C16394 | C16395 | C16396 | C16397 | C16398 | C16399 | C16400 | C16401 |
| C16402 | C16411 | C16412 | C16413 | C16472 | C16473 | C16474 | C16475 |
| C16476 | C16477 | C16544 | C16545 | C16547 | C16548 | C16549 | C16550 |
| C16551 | C16552 | C16553 | C16554 | C16555 | C16556 | C16557 | C16558 |
| C16559 | C16560 | C16561 | C16569 | C16570 | C16571 | C16572 | C16577 |
| C16578 | C16586 | C16587 | C16591 | C16592 | C16595 | C16596 | C16601 |
| C16602 | C16603 | C16604 | C16607 | C16608 | C16609 | C16610 | C16613 |
| C16614 | C16617 | C16618 | C16619 | C16621 | C16622 | C16623 | C16630 |
| C16631 | C16632 | C16633 | C16634 | C16635 | C16641 | C16643 | C16648 |
| C16649 | C16650 | C16651 | C16652 | C16653 | C16654 | C16655 | C16656 |
| C16657 | C16658 | C16659 | C16660 | C16661 | C16662 | C18099 | C18100 |
| C18101 | C18102 | C18103 | C18104 | C18105 | C18106 | C18107 | C18108 |
| C18109 | C18110 | C18111 | C18112 | C18113 | C18114 | C18115 | C18116 |



C18117 C18118 C18119 C18120 C18121 C18122 C18123 C18180  
C18215 C18216 C18236 C18240 C18246 C18247 C18248 C18249  
C18250 C18251 C18252 C18253 C18254 C18255 C18257 C18258  
C18259 C18260 C18263 C18264 C18269 C18281 C18286 C18300  
C18302 C18304 C18305 C18306 C18307 C18308 C18311 C18312  
C18314 C18315 C18316 C18317 C18320

(II) 21 enzymes

YBR145W YBR208C YDL086W YDL168W YDR242W  
YDR402C YGL256W YHR216W YIL160C YLR245C  
YLR432W YML056C YML106W YMR083W YMR169C  
YMR170C YMR217W YMR271C YMR303C YNR012W  
YOL086C
